# Supplementary material
Source: publisher site journal article supplement (https://www.dovepress.com/article/600320)
Supplement: Supplementary file 1 [file 600320%20Revised%20Supplementary%20Questions.docx]

| **Quality of vision questionnaire** | | | |
| --- | --- | --- | --- |
| **Do you experience glare, and how much does it bother you?** | | | |
| 0 = Not at all | 1 = A little | 2 = Quite | 3= Very |
| **Do you experience halos, and how much does it bother you?** | | | |
| 0 = Not at all | 1 = A little | 2 = Quite | 3= Very |
| **Do you experience starbursts, and how much does it bother you?** | | | |
| 0 = Not at all | 1 = A little | 2 = Quite | 3= Very |
| **Do you experience hazy vision, and how much does it bother you?** | | | |
| 0 = Not at all | 1 = A little | 2 = Quite | 3= Very |
| **Do you experience blurred vision, and how much does it bother you?** | | | |
| 0 = Not at all | 1 = A little | 2 = Quite | 3= Very |
| **Do you experience distortion, and how much does it bother you?** | | | |
| 0 = Not at all | 1 = A little | 2 = Quite | 3= Very |
| **Do you experience double vision, and how much does it bother you?** | | | |
| 0 = Not at all | 1 = A little | 2 = Quite | 3= Very |
| **Do you experience a fluctuation in vision, and how much does it bother you?** | | | |
| 0 = Not at all | 1 = A little | 2 = Quite | 3= Very |
| **Do you experience a difficulty in depth perception, and how much does it bother you?** | | | |
| 0 = Not at all | 1 = A little | 2 = Quite | 3= Very |

**Supplementary Questions 1**

**Table 2**

| **Patient experience questionnaire** | | | | |
| --- | --- | --- | --- | --- |
| **Is your vision better than what it was preoperatively? (without the use of glasses or contact lenses)** | | | | |
| Better | Unchanged | Worse | Can’t remember |  |
| **Would you choose this procedure again?** | | | |  |
| Yes | No | Maybe |  |  |
| **Would you recommend this procedure?** | | | |  |
| Yes | No | Maybe |  |  |
| **How often do you require reading glasses?** | | | |  |
| Never | Occasionally | Quite often | Always |  |
|  | | | | |
| **How much difficulty do you have doing a regular task that requires you to see well in the distance? Reported for two regular activities** | | | | |
| Distance vision is clear | Slight problem | Moderate problem | Severe problem | Intolerable problem |
| **How much difficulty do you have doing a regular task that requires you to see well at intermediate working distances? Reported for two regular activities** | | | | |
| Intermediate vision is clear | Slight problem | Moderate problem | Severe problem | Intolerable problem |
| **How much difficulty do you have doing a regular task that requires you to see well at near working distances? Reported for two regular activities** | | | | |
| Near vision is clear | Slight problem | Moderate problem | Severe problem | Intolerable problem |
|  | | | | |
| **How were your expectations fulfilled with the procedure?** | | | | |
| More than fulfilled | Fulfilled | Sufficiently fulfilled | Not fulfilled at all |  |
